# Supplementary material
Source: publisher site journal article supplement (https://www.degruyterbrill.com/publication/dbid/dlo/downloadAsset/DLO_DLO_Paul%20Raabe_Einfuehrung--de.pdf)
Supplement: Supplementary file 1 [file DLO_DLO_Paul%20Raabe_Einfuehrung--de.pdf]

Paul Raabe

## Deutsche Literatur des 18. Jahrhunderts und ihre Autoren. Eine Einführung

Anfang und Ende des 18. Jahrhunderts sind auch im literarischen Leben in Deutschland zwei folgenreiche Einschnitte. Um 1700 fällt der Höhepunkt des höfischen Spätbarock mit der von Frankreich und vor allem von England her beeinflussten Frühaufklärung zusammen, die die Vernunft der göttlichen Ordnung an die Seite stellte. Um 1800 hat die Aufklärung im Sinne von Immanuel Kant – „bediene dich deines eigenen Verstandes“ – alle Bereiche des gesellschaftlichen Lebens erfasst. Zugleich aber rücken die Klassiker und Romantiker die Autonomie der Kunst an die Stelle des Nützlichkeitsdenkens der von ihnen als Rationalisten verachteten Aufklärer.

Man kann zwar das 18. Jahrhundert nicht mit der Aufklärung in Deutschland gleichsetzen. Doch von der Frühaufklärung, die von den Universitäten in Halle und Leipzig ausging, bis zur Spätaufklärung, deren bedeutendste Protagonisten Friedrich Nicolai und seine Freunde in Berlin waren, gab es eine bruchlose Entwicklung. Die verschiedenen Tendenzen, Ereignisse und Gruppierungen des literarischen Lebens standen letzten Endes alle mit der Aufklärung und später mit der Emanzipation des Bürgertums im Einklang: der Kreis des Hamburger „Patrioten“ um 1720, Johann Christoph Gottsched und seine Leipziger Schule, der Hallesche Freundeskreis der Anakreontiker, der Kopenhagener Kreis um Friedrich Gottlieb Klopstock, später der Göttinger Hainbund, die Genieepoche des Sturm und Drang, der Kult der Empfindsamkeit und schließlich die deutsche Literatur unter dem Eindruck der Französischen Revolution, die man zu Unrecht die jakobinische genannt hat.

Im Laufe des 18. Jahrhunderts bildete sich die deutsche Literatursprache heraus, Poetik und Ästhetik kamen unter den Einfluss der Aufklärungsphilosophie, antike Dichtungsarten und Gattungsformen wurden übernommen und umgestaltet, die Lehrgedichte und Fabeln waren die beliebtesten Gattungen in der Blütezeit der Aufklärung. Das bürgerliche Trauerspiel überwand die starren Konventionen der heroischen Tragödie und der Schuldramen früherer Jahrhunderte. Überhaupt verstand sich das Theater immer mehr als moralische Anstalt und gewann an einigen Orten als Nationaltheater höheres Ansehen. Die Romanliteratur war im Laufe des Jahrhunderts immer mehr in Mode gekommen. Es erschienen anspruchsvolle Erzählwerke neben einer weit verbreiteten Unterhaltungsliteratur mit Ritterromanen und Gespenstergeschichten, Räuberromanen und Liebesgeschichten.

Der Büchermarkt erlebte in der zweiten Hälfte des 18. Jahrhunderts durch die Abschaffung des mittelalterlichen Tauschhandels und die Einführung des Nettozahlungsverkehrs umfassende Reformen. Die Leipziger Buchmesse wurde das Zentrum des Buchwesens, das in der Aufklärung sehr von den aktiven Leipziger Buchhändlern geprägt wurde. Nach dem Siebenjährigen Krieg stieg die Buchproduktion in Deutschland sprunghaft an. Erschienen um 1700 etwa 1.000 neue Bücher jährlich auf dem

Markt, vorwiegend in der lateinischen Gelehrtensprache, so waren es am Ende des 18. Jahrhunderts ca. 6.000 Neuerscheinungen, fast ausschließlich in deutscher Sprache. Das Lateinische spielte im öffentlichen Leben kaum noch eine Rolle. Hatte um 1700 die theologische Literatur weitgehend den Buchmarkt beherrscht, so war es am Ende des Jahrhunderts die schöne Literatur. Das Erscheinen von Romanen und Erzählungen, Gedichtbüchern und Dramenheften, Fabeln und Anekdoten prägte den Buchhandel neben der Aufklärungsliteratur, den Zeitschriften und Almanachen

Die Aufklärung war in Deutschland weitgehend eine Aufklärung durch Bücher. Die Bürger in den Städten und auf dem Lande, nicht nur die herrschende Schicht der Beamten, auch die Frauen, die Offiziere, die Kaufleute, die Schüler verlangten Bücher. Die Nachfrage hatte eine steigende Produktion zur Folge. So kam es in den letzten Jahrzehnten des Jahrhunderts zu einer Leserevolution, die nach und nach immer breitere Schichten der Bevölkerung ergriff. Die schöne Literatur hatte einen Markt erhalten. Man wollte unterhalten sein, aber man nutzte das Lesen auch zur Aneignung von Wissen und Kenntnissen. Dass in den Zeitschriften die „Lesewut“ diskutiert wurde, zeigt den Wandel und die Entstehung einer vielschichtigen Lesekultur. Sie fand ihren Ausdruck auch in der Entstehung und Einrichtung von Lesekabinetten und Lesegesellschaften, deren Mitglieder sich so ihre Lektürewünsche erfüllen konnten. Bald entstanden daneben auch kommerzielle Leihbibliotheken, die bis weit ins 20. Jahrhundert bestanden.

An der Entstehung einer neuen Buch- und Lesekultur im Zeitalter der Aufklärung waren neben den Buchhändlern und Verlegern, den Druckern und Buchbindern zualererst die Verfasser der Bücher, die Autoren beteiligt, im Bereich der schönen Literatur also die Dichter und Schriftsteller. Sie gehörten meist der bürgerliche Klasse an. Adlige unter den Bücherschreibern waren seltener. Die überwiegende Zahl schrieb und veröffentlichte in den Nebenstunden, also neben der beruflichen Arbeit. Vorwiegend waren es akademisch gebildete Beamte und Juristen, aber auch Pastoren. In der Mitte des 18. Jahrhunderts trifft man die ersten „freien“ Schriftsteller an, solche also, die von der Feder zu leben versuchten. Der oft in diesem Zusammenhang zitierte Friedrich Gottlieb Klopstock ist kein gutes Beispiel. Zwar ging er keinem bürgerlichen Beruf nach, wohl aber lebte er von den Zuwendungen der Fürsten. Dagegen brachte Adolph Freiherr Knigge in den letzten beiden Dezennien des Jahrhunderts seine Familie und sich mit dem Bücherschreiben durch die Zeit, bis er schließlich doch ein geregeltes Einkommen als Oberhauptmann in Bremen hatte.

Das 18. Jahrhundert brachte bekanntlich in Deutschland anderthalb Dutzend bedeutende Dichter und Schriftsteller hervor, die man zur Aufklärung zählen kann und deren Werke und Schriften bis heute bekannt sind, gelesen, rezipiert und erforscht werden, die also unbestritten in die Literaturgeschichte eingegangen sind. Ihre Zahl ist wirklich überschaubar. Zur Einführung in eine virtuelle Bibliothek der deutschen Literatur des 18. Jahrhunderts ist es sinnvoll, ihre Namen an dieser Stelle aufzuzählen, denn man kann sie als Hauptautoren in dem weitgespannten Kanon, von dem noch die Rede sein wird, bezeichnen: Johann Christoph Gottsched und Christian Fürchtegott

Gellert in Leipzig als prägende Autoren ihrer Zeit, Friedrich Gottlieb Klopstock, Gotthold Ephraim Lessing und seine Freunde Moses Mendelssohn und Friedreich Nicolai, der Osnabrücker Justus Möser, Christoph Martin Wieland, Johann Joachim Winckelmann als Wiederentdecker antiker Kunst, Johann Georg Hamann und Johann Gottfried Herder, in Göttingen Georg Christoph Lichtenberg, in Zürich Johann Kaspar Lavater, dann schließlich die Spätaufklärer Jacob Wilhelm Heinse, Karl Philipp Moritz, Georg Forster, Adolph Freiherr Knigge, Ulrich Bräker und Johann Gottfried Seume.

Daneben haben noch einmal so viele Dichter und Schriftsteller entscheidenden Anteil an der Entwicklung der deutschen Literatur im 18. Jahrhundert. Sie sind allerdings mehr Gegenstand germanistischer Forschung, als dass ihre Werke, von einigen rühmlichen Ausnahmen abgesehen, im Buchhandel präsent sind: die Hamburger Barthold Heinrich Brockes und Friedrich von Hagedorn, die Schweizer Albrecht von Haller, Johann Jakob Bodmer und Johann Jakob Breitinger, die Anacreontiker Johann Wilhelm Ludwig Gleim, Johann Nikolaus Götz und Johann Peter Uz, die Hainbündler Gottfried August Bürger, Johann Heinrich Voss, die Brüder Stolberg, Ludwig Höltz, die Dichter des Sturm und Drang Friedrich Maximilian Klinger, Jakob Michael Reinhold Lenz und andere. Hinter jedem der genannten Autoren stehen Bücher und Dichtungen, von denen manche die Zeiten überdauert haben und die Bedeutung der deutschen Literatur im Jahrhundert der Aufklärung unterstreichen.

Im Allgemeinen beschränkt sich die literarhistorische Forschung mehr oder minder auf diesen Kanon von Schriftstellern des 18. Jahrhunderts. Ein weiteres Dutzend bekannter Namen lässt sich ergänzend hinzufügen: z. B. Christian Ludwig Liscow, Ewald von Kleist, Gottlieb Wilhelm Rabener, Salomon Gessner, Heinrich Wilhelm Gerstenberg, Karl Wilhelm Ramler, Gottlieb Conrad Pfeffel, Peter Helfrich Sturz, Gottlieb Theodor von Hippel, Karl Friedrich Bahrdt und einige weitere. Übrigens ist die Zahl der Schriftstellerinnen im 18. Jahrhundert außerordentlich gering: außer der Karschin, Sophie Schwarz, Friederike Lohmann sind es einige weitere so gut wie vergessene Autorinnen.

Die Zahl der nennenswerten Dichter, Schriftsteller und Schriftstellerinnen im 18. Jahrhundert ist um ein Vielfaches größer als die knapp 50 Namen, die hier expressis verbis aufgezählt wurden. Unter Berufung auf die bibliographischen Mitteilungen in Karl Goedeke's „Grundriss zur Geschichte der deutschen Dichtung“ und Leopold Hirschberg's „Taschengoedeke“, die für die vorliegende Edition kritisch überarbeitet und ergänzt wurden, verzeichnet die vorliegende Online-Edition der „Deutschen Literatur des 18. Jahrhunderts“ 642 Autoren als Verfasser von 2.675 Büchern in 4.494 Bänden. Zusätzlich zu den bekannten Dichtern und Schriftstellern wurde also eine sehr große Zahl von *poetae minores* einbezogen, denen meist nur eine regionale oder gar bloß eine lokale Bedeutung zukommt. Die Aufnahme so vieler unbekannter oder unbedeutender Namen bedarf mit Hinweis auf die Autoritäten Karl Goedeke und Leopold Hirschberg keiner Begründung, wohl aber eines Hinweises auf die Möglichkeiten, die sich aus der Online-Edition für den Benutzer ergeben. Um es vorweg zu sagen: sie sind ganz einzigartig. Selbstverständlich kann man die vorliegende Datenbank zum Auffinden der Werke eines Autors oder eines seiner Texte nutzen. Der Vorteil gegenüber dem Nachschlagen

in einer Bibliographie besteht darin, dass man nicht nur den Titel eines Buches schnell feststellen und sich mit dem Inhalt der Schrift sofort an Hand des Inhaltsverzeichnisses vertraut machen kann, sondern daß der Benutzer auch den vollen Text auf dem Bildschirm hat.

Und schließlich: Die Online-Edition speichert elektronisch ca. 1,1 Millionen Buchseiten Text aus dem 18. Jahrhundert. Da es technisch gelungen ist, jeden Text, auch in Fraktur gedruckt, elektronisch lesbar zu machen, kann man jedes Wort, das man eingibt, in einem der ca. 4.500 eingegebenen Bände per Mausklick auffinden und lesen. Was dies der literaturwissenschaftliche Forschung bedeuten wird, ist noch nicht abzusehen. Jedenfalls erschließt dieser Zugriff den Inhalt der eingespeicherten literarischen Werke auf eine ganz ungewöhnliche Weise.

Diese Online-Edition wird, dessen bin ich sicher, der literaturgeschichtlichen Erforschung des 18. Jahrhunderts neue Perspektiven eröffnen. Dafür ist allen zu danken, die an diesem Unternehmen im K. G. Saur Verlag beteiligt waren.

Paul Raabe
